# Supplementary material for: Cyano-bridged gadolinium(iii)-tungstate(v) bimetallic assembly with a one-dimensional chain structure
Source: Royal Society of Chemistry journal article supplement (doi:10.1039/b503426d), 2005-01-01
Supplement: b503426d.pdf [file b503426d.pdf]

## Cyano-bridged gadolinium(III)-tungstate(V) bimetallic assembly with a one-dimensional chain structure

Satoru Ikeda,<sup>a</sup> Toshiya Hozumi,<sup>a</sup> Kazuhito Hashimoto,<sup>\*a</sup> and Shin-ichi Ohkoshi<sup>\*,a,b</sup>

<sup>a</sup> Department of Applied Chemistry, School of Engineering, The University of Tokyo,  
7-3-1 Hongo, Bunkyo-ku, Tokyo 113-8656, Japan

<sup>b</sup> PRESTO, JST, 4-1-8 Honcho Kawaguchi, Saitama 332-0012, Japan

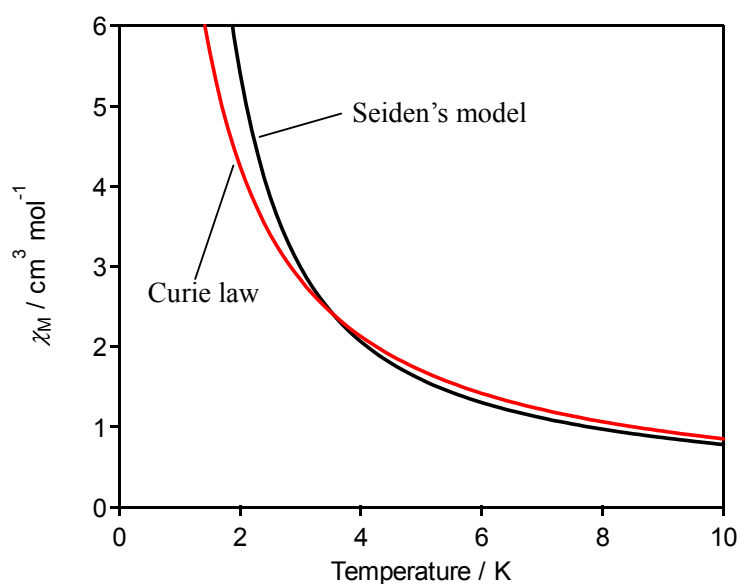

Fig. S1 Calculated magnetic susceptibilities of Seiden's model (black solid line) and Curie law (red solid line). The curve of Seiden's model is calculated using the parameters of  $g_w = 1.96$ ,  $g_{Gd} = 2.02$ , and  $J = -0.58 \text{ cm}^{-1}$ . On the contrary, the curve of Curie law is calculated using the corresponding system. These two curves cross at about 3.5 K, and below this temperature,  $\chi_M$  value of Seiden's model goes over that of Curie law.
